# Supplementary material for: Estimating Risk of Chronic Pain and Disability Following Musculoskeletal Trauma in the United Kingdom
Source: PubMed Central journal article supplement (PMC9419019; doi:10.1001/jamanetworkopen.2022.28870), 2022-08-26
Supplement: jamanetwopen-e2228870-s001.pdf [file jamanetwopen-e2228870-s001.pdf]

## Supplemental Online Content

Evans DW, Rushton A, Middlebrook N, et al. Estimating risk of chronic pain and disability following musculoskeletal trauma in the United Kingdom. *JAMA Netw Open*. 2022;5(8):e2228870. doi:10.1001/jamanetworkopen.2022.28870

**eFigure 1.** Chronic Pain Grade Scores at 6 Months and 12 Months Posttrauma

**eFigure 2.** Calibration Plot for 6-Month Multivariate Model

**eFigure 3.** Calibration Plot for 12-Month Multivariate Model

**eTable 1.** Summary of Data Collected Within the Major Trauma Center

**eTable 2.** Participant Baseline Characteristics by Participant Retention

**eTable 3.** Participant Baseline Characteristics by Outcome

**eTable 4.** Multivariable Model Performance

**eTable 5.** Nomogram Scoring Tables

**eReferences**

This supplemental material has been provided by the authors to give readers additional information about their work.

**eFigure 1. Chronic Pain Grade Scores at 6 Months and 12 Months Posttrauma**

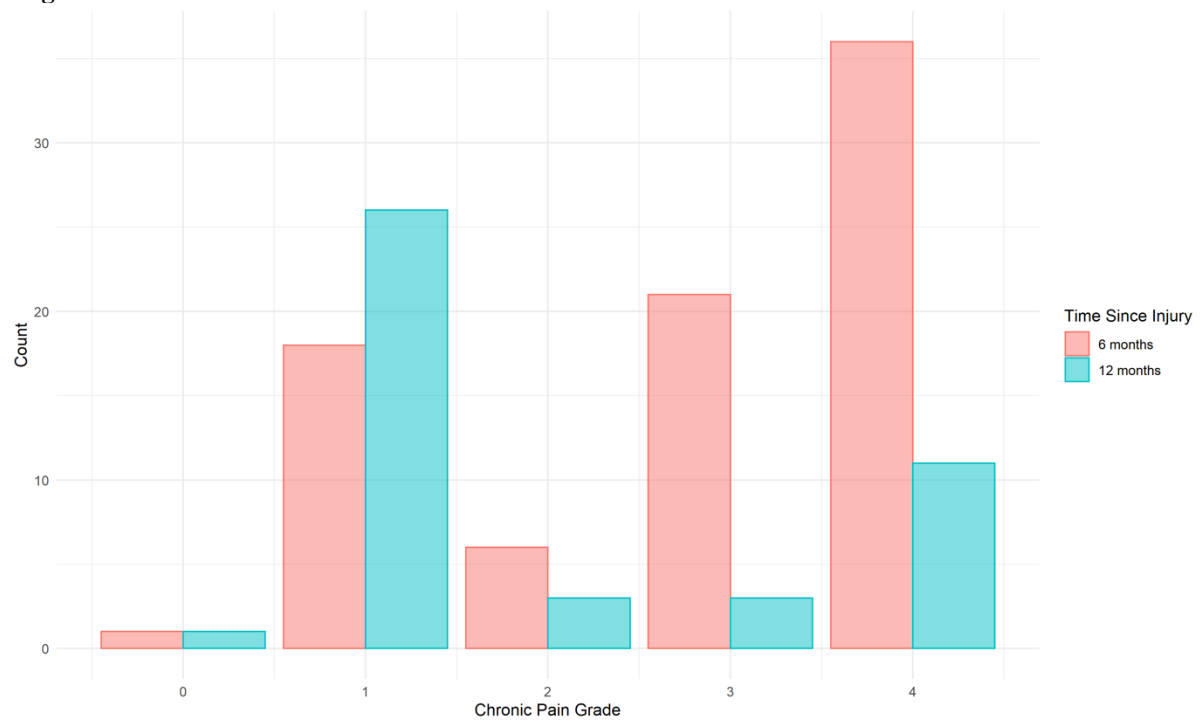

**eFigure 2. Calibration Plot for 6-Month Multivariate Model**

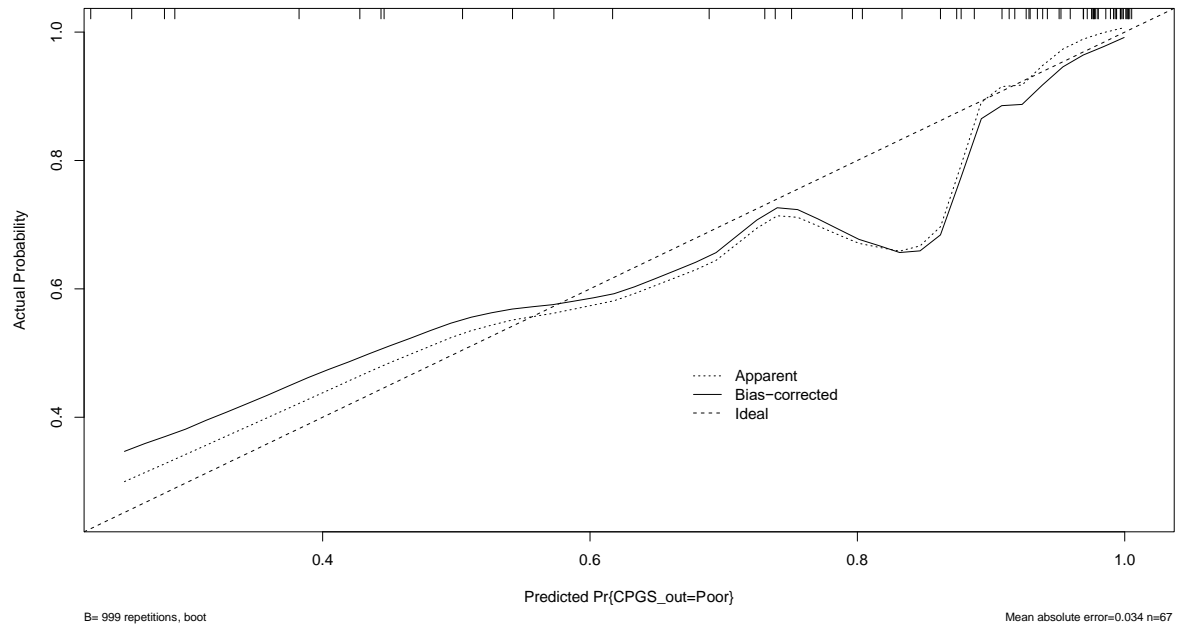

**eFigure 3. Calibration Plot for 12-month Multivariate Model**

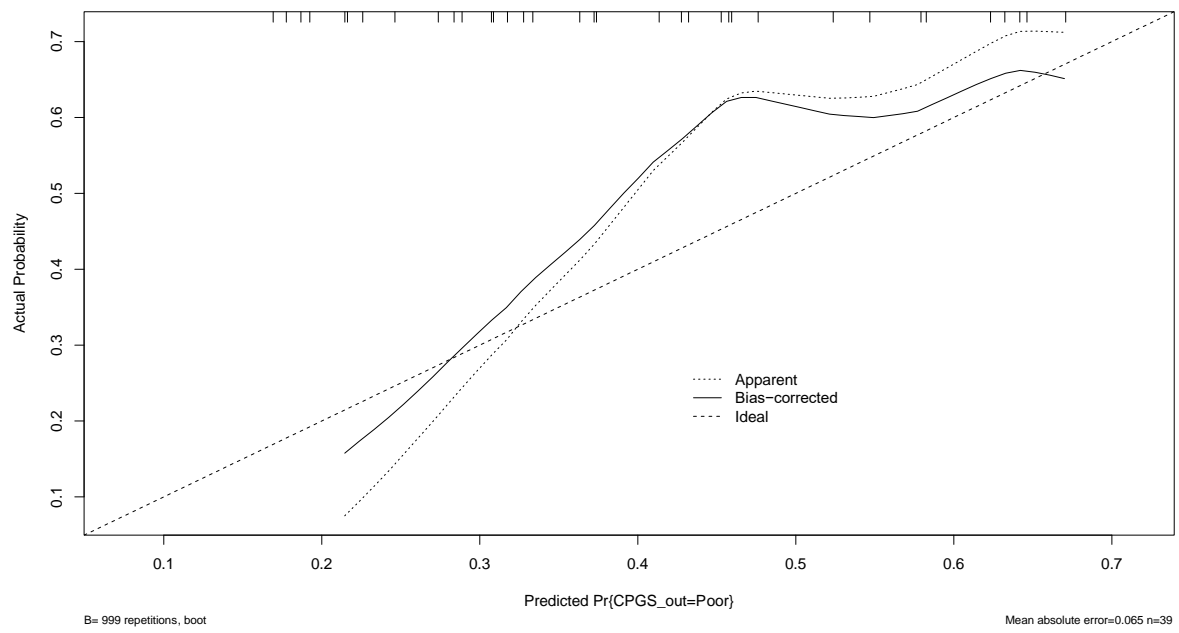

**eTable 1. Summary of Data Collected Within the Major Trauma Center**

| <b>Domain</b>                                       | <b>Measure</b>                                                                                                                                                | <b>Baseline</b><br><i>≤14 days post-trauma</i> | <b>Follow-up</b><br><i>3-, 6- and 12-months post-trauma</i> |
|-----------------------------------------------------|---------------------------------------------------------------------------------------------------------------------------------------------------------------|------------------------------------------------|-------------------------------------------------------------|
| <b>General patient characteristics</b>              |                                                                                                                                                               |                                                |                                                             |
| Age                                                 | Years                                                                                                                                                         | ✓                                              |                                                             |
| Gender assigned at birth                            | Female / male / not disclosed                                                                                                                                 | ✓                                              |                                                             |
| Body Mass Index (BMI)                               | Calculated from height and weight measurements                                                                                                                | ✓                                              |                                                             |
| Education                                           | Highest educational level attained                                                                                                                            | ✓                                              |                                                             |
| Employment status                                   | Full-time/ part-time / not working / retired / student<br>Employed / self-employed                                                                            | ✓                                              |                                                             |
| Circumstance of trauma                              | Civilian / military                                                                                                                                           | ✓                                              |                                                             |
| Previous history of musculoskeletal pain and injury | Patient history data from patient recollection and medical records                                                                                            | ✓                                              |                                                             |
| Comorbidity of other health problems                | Patient history data from patient recollection and medical records                                                                                            | ✓                                              |                                                             |
| Premorbid physical health                           | Patient history data from patient recollection and medical records                                                                                            | ✓                                              |                                                             |
| Premorbid psychological health                      | Patient history data from medical records and patient recollection (including non-somatic items from the Subjective Health Complaints Inventory) <sup>1</sup> | ✓                                              |                                                             |
| Number of days in hospital                          | Intensive care / ward / total                                                                                                                                 | ✓                                              |                                                             |
| <b>Injury characteristics</b>                       |                                                                                                                                                               | ✓                                              |                                                             |
| Time of injury/incident                             | Hospital record data                                                                                                                                          | ✓                                              |                                                             |
| Injury location                                     | Adapted pain drawings, based on hospital record data                                                                                                          | ✓                                              |                                                             |
| Tissues damaged                                     | Based on imaging data and hospital records<br>Fractures (number, location)<br>Penetrating / non-penetrating injury / both                                     | ✓                                              |                                                             |
| Surgery required                                    | Location and post-injury timing of surgery, based on hospital record data                                                                                     | ✓                                              |                                                             |
| Assisted mechanical ventilation required            | Yes (duration) / no                                                                                                                                           | ✓                                              |                                                             |
| Severity of injury                                  | Injury Severity Scale <sup>2</sup>                                                                                                                            | ✓                                              |                                                             |
| <b>Quality of life and physical functioning</b>     |                                                                                                                                                               |                                                |                                                             |

|                                                                         |                                                                                                                                                                           |   |   |
|-------------------------------------------------------------------------|---------------------------------------------------------------------------------------------------------------------------------------------------------------------------|---|---|
| General health                                                          | 36-item Short Form Health Survey, version 2 (SF-36v2) <sup>3</sup>                                                                                                        | ✓ | ✓ |
| Health-related quality of life                                          | EuroQol EQ-5D-5L <sup>4</sup>                                                                                                                                             | ✓ | ✓ |
| Sleep quality (past 24h, average since injury)                          | 11-point (0-10) Numerical Rating Scales, relating to current pain, from 'best possible sleep'(0) to 'worst possible sleep' (10) <sup>5</sup>                              | ✓ | ✓ |
| Anxiety and depression                                                  | Hospital Anxiety and Depression Scales (HADS) <sup>6</sup>                                                                                                                | ✓ | ✓ |
| Fear of movement or fear of injury or re-injury during movement         | Tampa Scale of Kinesiophobia, 11-item (TSK-11) <sup>7</sup>                                                                                                               | ✓ | ✓ |
| Confidence in ability to perform activities despite pain                | Pain Self-Efficacy Questionnaire <sup>8</sup>                                                                                                                             | ✓ | ✓ |
| Post-traumatic stress (intrusion, avoidance and hyperarousal subscales) | Impact of Event Scale revised (IES-R) <sup>9</sup>                                                                                                                        | ✓ | ✓ |
| <b>Pain characteristics</b>                                             |                                                                                                                                                                           |   |   |
| Pain severity                                                           | Chronic Pain Grade Scale <sup>10</sup>                                                                                                                                    |   | ✓ |
| Pain intensity (current, average, worst and least)                      | 11-point (0-10) Numerical Rating Scale, relating to current pain, from 'no pain' (0) to 'pain as bad as could be' (10) (from the Chronic Pain Grade Scale <sup>10</sup> ) | ✓ | ✓ |
| Self-reported features of neuropathic pain                              | painDETECT questionnaire <sup>11</sup>                                                                                                                                    | ✓ | ✓ |
| Pain location                                                           | Pain drawing                                                                                                                                                              | ✓ | ✓ |
| Pain extent                                                             | Electronic pain drawing <sup>12</sup>                                                                                                                                     | ✓ |   |
| Pain medication intake (type, dosage and timing)                        | Medication Quantification Scale, <sup>13-15</sup> based on hospital record data                                                                                           | ✓ |   |
| <b>Quantitative sensory testing</b>                                     |                                                                                                                                                                           |   |   |
| Heat pain threshold                                                     | Evaluation of pain threshold using a heat stimulus                                                                                                                        | ✓ |   |
| Cold pain threshold                                                     | Evaluation of pain threshold using a cold stimulus                                                                                                                        | ✓ |   |
| Pressure pain threshold                                                 | Evaluation of pain threshold using a pressure stimulus                                                                                                                    | ✓ |   |
| <b>Biomarkers</b>                                                       |                                                                                                                                                                           |   |   |
| C-reactive protein (CRP)                                                | Serum levels of CRP, a broad indicator of inflammation (via blood samples)                                                                                                | ✓ |   |

**eTable 2. Participant Baseline Characteristics by Participant Retention**

| Characteristic                                 | Responded at 6 months |                  |         | Responded at 12 months |                  |         |
|------------------------------------------------|-----------------------|------------------|---------|------------------------|------------------|---------|
|                                                | Yes                   | No               | p-value | Yes                    | No               | p-value |
| Total, n (%)                                   | 67 (54.0)             | 57 (46.0)        |         | 39 (31.5)              | 85 (68.5)        |         |
| <b>Demographics</b>                            |                       |                  |         |                        |                  |         |
| Age, mean (SD), y                              | 50.11<br>(17.53)      | 47.42<br>(20.14) | 0.428   | 52.89<br>(17.21)       | 47.03<br>(19.22) | 0.106   |
| BMI, mean (SD), kg/m <sup>2</sup>              | 28.34<br>(6.70)       | 27.30<br>(5.84)  | 0.363   | 28.06<br>(7.11)        | 27.77<br>(5.95)  | 0.816   |
| Female gender at birth, n (%)                  | 27 (40.3)             | 17 (29.8)        | 0.305   | 16 (41.0)              | 28 (32.9)        | 0.502   |
| Male gender at birth, n (%)                    | 40 (59.7)             | 40 (70.2)        |         | 23 (59.0)              | 57 (67.1)        |         |
| White ethnicity, n (%)                         | 57 (85.1)             | 47 (82.5)        | 0.881   | 35 (89.7)              | 69 (81.2)        | 0.346   |
| Non-white ethnicity, n (%)                     | 10 (14.9)             | 10 (17.5)        |         | 4 (10.3)               | 16 (18.8)        |         |
| Education age 16 or less, n (%)                | 26 (39.4)             | 22 (38.6)        | 0.720   | 14 (36.8)              | 34 (40.0)        | 0.800   |
| Education age 17-19, n (%)                     | 22 (33.3)             | 18 (31.6)        |         | 15 (39.5)              | 25 (29.4)        |         |
| Education age 20 or over, n (%)                | 15 (22.7)             | 15 (26.3)        |         | 8 (21.1)               | 22 (25.9)        |         |
| Still in full-time education, n (%)            | 3 (4.5)               | 1 (1.8)          |         | 1 (2.6)                | 3 (3.5)          |         |
| Preferred not to disclose education age, n (%) | 0 (0.0)               | 1 (1.8)          |         | 0 (0.0)                | 1 (1.2)          |         |
| Working, n (%)                                 | 45 (67.2)             | 33 (57.9)        | 0.217   | 25 (64.1)              | 53 (62.4)        | 0.627   |
| Not working, n (%)                             | 22 (32.8)             | 22 (38.6)        |         | 14 (35.9)              | 30 (35.3)        |         |
| Preferred not to disclose work status, n (%)   | 0 (0.0)               | 2 (3.5)          |         | 0 (0.0)                | 2 (2.4)          |         |
| Smoker, n (%)                                  | 11 (16.4)             | 10 (17.5)        | 0.634   | 5 (12.8)               | 16 (18.8)        | 0.710   |
| Non-smoker, n (%)                              | 51 (76.1)             | 40 (70.2)        |         | 30 (76.9)              | 61 (71.8)        |         |
| Ex-smoker, n (%)                               | 5 (7.5)               | 7 (12.3)         |         | 4 (10.3)               | 8 (9.4)          |         |
| <b>Hospital data</b>                           |                       |                  |         |                        |                  |         |
| Hospital stay, mean (SD), d                    | 18.33<br>(14.52)      | 16.65<br>(14.41) | 0.521   | 19.03<br>(17.05)       | 16.88<br>(13.12) | 0.445   |
| ISS Total, mean (SD)                           | 9.90 (7.36)           | 10.66<br>(8.60)  | 0.663   | 8.65 (5.83)            | 11.07<br>(8.69)  | 0.168   |
| ISS Mild, n (%)                                | 22 (42.3)             | 14 (40.0)        | 0.919   | 15 (48.4)              | 21 (37.5)        | 0.568   |
| ISS Moderate, n (%)                            | 20 (38.5)             | 13 (37.1)        |         | 11 (35.5)              | 22 (39.3)        |         |
| ISS Major, n (%)                               | 10 (19.2)             | 8 (22.9)         |         | 5 (16.1)               | 13 (23.2)        |         |
| Number of fractures, mean (SD)                 | 1.75 (1.20)           | 2.06 (1.29)      | 0.180   | 1.59 (1.07)            | 2.03 (1.30)      | 0.075   |
| Penetrating injury, n (%)                      | 49 (73.1)             | 38 (66.7)        | 0.557   | 30 (76.9)              | 57 (67.1)        | 0.366   |
| Non-penetrating injury, n (%)                  | 18 (26.9)             | 19 (33.3)        |         | 9 (23.1)               | 28 (32.9)        |         |
| <b>General health measures</b>                 |                       |                  |         |                        |                  |         |
| EQ-5D-5L Index, mean (SD)                      | 0.02 (0.32)           | 0.06 (0.31)      | 0.498   | 0.04 (0.31)            | 0.04 (0.32)      | 0.968   |
| EQ-5D VAS, mean (SD)                           | 43.76<br>(24.86)      | 47.39<br>(23.58) | 0.409   | 48.08<br>(25.17)       | 44.21<br>(23.87) | 0.412   |
| SF36v2 Mental, mean (SD)                       | 31.20<br>(8.50)       | 30.72<br>(6.65)  | 0.732   | 35.22<br>(14.25)       | 36.49<br>(13.02) | 0.627   |
| SF36v2 Physical, mean (SD)                     | 35.83<br>(13.81)      | 36.38<br>(12.98) | 0.820   | 31.70<br>(8.20)        | 30.64<br>(7.45)  | 0.479   |
| <b>Psychological measures</b>                  |                       |                  |         |                        |                  |         |
| HADS Anxiety, mean (SD)                        | 8.22 (5.03)           | 7.60 (4.81)      | 0.497   | 8.13 (5.59)            | 7.84 (4.59)      | 0.765   |
| HADS Depression, mean (SD)                     | 7.75 (4.21)           | 7.36 (4.46)      | 0.620   | 7.62 (4.66)            | 7.55 (4.17)      | 0.936   |
| TSK-11 Total, mean (SD)                        | 28.27<br>(7.50)       | 25.85<br>(6.75)  | 0.073   | 27.71<br>(7.98)        | 26.93<br>(6.93)  | 0.592   |
| PSEQ Total, mean (SD)                          | 16.89<br>(14.72)      | 18.54<br>(15.44) | 0.554   | 16.57<br>(15.56)       | 18.12<br>(14.82) | 0.603   |
| IES-R Total, mean (SD)                         | 30.04<br>(21.59)      | 28.70<br>(19.97) | 0.737   | 28.87<br>(21.00)       | 29.82<br>(20.93) | 0.819   |

| Characteristic                                 | Responded at 6 months |                    |                 | Responded at 12 months |                    |                 |
|------------------------------------------------|-----------------------|--------------------|-----------------|------------------------|--------------------|-----------------|
|                                                | Yes                   | No                 | <i>p</i> -value | Yes                    | No                 | <i>p</i> -value |
| IES-R Avoidance, mean (SD)                     | 1.27 (0.98)           | 1.24 (0.88)        | 0.862           | 1.17 (0.97)            | 1.30 (0.92)        | 0.458           |
| IES-R Hyperarousal, mean (SD)                  | 1.32 (1.10)           | 1.26 (1.02)        | 0.772           | 1.29 (1.13)            | 1.29 (1.03)        | 1.000           |
| IES-R Intrusion, mean (SD)                     | 1.50 (1.09)           | 1.35 (0.98)        | 0.444           | 1.47 (1.04)            | 1.41 (1.05)        | 0.764           |
| <b><i>Pain measures</i></b>                    |                       |                    |                 |                        |                    |                 |
| Pain intensity (average), mean (SD)            | 4.67 (2.02)           | 4.87 (2.22)        | 0.688           | 4.65 (2.17)            | 4.80 (2.05)        | 0.740           |
| Pain intensity (current), mean (SD)            | 3.62 (2.55)           | 3.75 (2.27)        | 0.807           | 3.48 (2.53)            | 3.77 (2.40)        | 0.602           |
| Pain intensity (worst), mean (SD)              | 8.33 (2.08)           | 8.47 (2.18)        | 0.767           | 8.16 (2.42)            | 8.51 (1.92)        | 0.469           |
| Pain intensity (least), mean (SD)              | 2.27 (2.36)           | 2.50 (2.50)        | 0.672           | 2.35 (2.46)            | 2.36 (2.39)        | 0.995           |
| Pain extent, mean (SD), % pixels               | 8.07 (7.26)           | 7.06 (4.96)        | 0.511           | 5.69 (5.17)            | 9.00 (7.02)        | 0.026           |
| Pain region count, mean (SD), number           | 5.45 (4.79)           | 5.28 (4.53)        | 0.843           | 4.79 (4.49)            | 5.64 (4.73)        | 0.353           |
| PainDETECT Total, mean (SD)                    | 13.59<br>(7.31)       | 13.87<br>(9.26)    | 0.884           | 13.54<br>(7.08)        | 13.79<br>(8.70)    | 0.903           |
| <b><i>Other measures</i></b>                   |                       |                    |                 |                        |                    |                 |
| Sleep quality last 24 hrs, mean (SD)           | 4.06 (2.50)           | 3.95 (2.66)        | 0.809           | 4.08 (2.28)            | 3.98 (2.70)        | 0.840           |
| Sleep quality since injury, mean (SD)          | 3.69 (2.42)           | 3.30 (2.57)        | 0.388           | 3.64 (2.40)            | 3.45 (2.54)        | 0.689           |
| Local heat pain threshold, mean (SD), °C       | 45.75<br>(3.56)       | 46.54<br>(3.30)    | 0.320           | 46.59<br>(3.02)        | 45.75<br>(3.68)    | 0.295           |
| Remote heat pain threshold, mean (SD), °C      | 46.08<br>(3.66)       | 46.06<br>(3.60)    | 0.976           | 47.03<br>(3.21)        | 45.51<br>(3.75)    | 0.068           |
| Local cold pain threshold, mean (SD), °C       | 5.81<br>(11.37)       | 2.95<br>(10.67)    | 0.267           | 6.21<br>(11.28)        | 3.89<br>(11.08)    | 0.369           |
| Remote cold pain threshold, mean (SD), °C      | 6.64<br>(11.12)       | 3.25<br>(11.29)    | 0.191           | 4.78<br>(10.21)        | 5.74<br>(11.88)    | 0.714           |
| Local pressure pain threshold, mean (SD), kPa  | 425.42<br>(198.56)    | 465.68<br>(225.04) | 0.406           | 402.02<br>(161.10)     | 463.62<br>(230.66) | 0.202           |
| Remote pressure pain threshold, mean (SD), kPa | 489.27<br>(236.39)    | 471.42<br>(243.15) | 0.746           | 494.87<br>(229.24)     | 475.09<br>(244.55) | 0.718           |
| C-reactive protein, mean (SD), mg/L            | 48.43<br>(52.84)      | 56.17<br>(72.82)   | 0.551           | 53.15<br>(59.75)       | 50.95<br>(63.49)   | 0.870           |



**eTable 3. Participant Baseline Characteristics by Outcome**

| Characteristic                                 | 6-months outcome |                  |                                           | 12-months outcome |                  |                                         |
|------------------------------------------------|------------------|------------------|-------------------------------------------|-------------------|------------------|-----------------------------------------|
|                                                | Good             | Poor             | Difference (95% CI); p-value              | Good              | Poor             | Difference (95% CI); p-value            |
| Total, n (%)                                   | 19<br>(23.2%)    | 63<br>(76.8%)    |                                           | 27<br>(61.4%)     | 17<br>(38.6%)    |                                         |
| <b>Demographics</b>                            |                  |                  |                                           |                   |                  |                                         |
| Age, mean (SD), y                              | 53.56<br>(17.61) | 50.11<br>(17.80) | -3.44 (-12.55, 5.67) <sup>1</sup> ; 0.459 | 53.29<br>(18.16)  | 57.12<br>(16.15) | 3.83 (-6.74, 14.4) <sup>1</sup> ; 0.477 |
| BMI, mean (SD), kg/m <sup>2</sup>              | 27.77<br>(2.72)  | 28.29<br>(7.01)  | 0.52 (-2.71, 3.75) <sup>1</sup> ; 0.753   | 25.93<br>(3.30)   | 30.91<br>(9.42)  | 4.98 (1.12, 8.84) <sup>1</sup> ; 0.012  |
| Female gender at birth, n (%)                  | 7 (36.8)         | 27 (42.9)        | 1                                         | 10 (37.0)         | 8 (47.1)         | 1                                       |
| Male gender at birth, n (%)                    | 12 (63.2)        | 36 (57.1)        | -0.78 (0.26, 2.2) <sup>2</sup> ; 0.639    | 17 (63.0)         | 9 (52.9)         | 0.66 (0.19, 2.28) <sup>2</sup> ; 0.511  |
| White ethnicity, n (%)                         | 16 (84.2)        | 53 (84.1)        | 1                                         | 24 (88.9)         | 16 (94.1)        | 1                                       |
| Non-white ethnicity, n (%)                     | 3 (15.8)         | 10 (15.9)        | 1.01 (0.27, 4.89) <sup>2</sup> ; 0.993    | 3 (11.1)          | 1 (5.9)          | 0.5 (0.02, 4.31) <sup>2</sup> ; 0.546   |
| Education age 16 or less, n (%)                | 8 (44.4)         | 26 (41.3)        | 1                                         | 8 (30.8)          | 9 (52.9)         | 1                                       |
| Education age 17-19, n (%)                     | 5 (27.8)         | 20 (31.7)        | 1.05 (0.40, 2.79) <sup>3</sup> ; 0.922    | 11 (42.3)         | 4 (23.5)         | 0.5 (0.16, 1.61) <sup>3</sup> ; 0.247   |
| Education age 20 or over, n (%)                | 4 (22.2)         | 14 (22.2)        |                                           | 6 (23.1)          | 4 (23.5)         |                                         |
| Still in full-time education, n (%)            | 0 (0.0)          | 3 (4.8)          |                                           | 1 (3.8)           | 0 (0.0)          |                                         |
| Preferred not to disclose education age, n (%) | 1 (5.6)          | 0 (0.0)          |                                           | 0 (0.0)           | 0 (0.0)          |                                         |
| Working, n (%)                                 | 13 (68.4)        | 40 (63.5)        | 1                                         | 16 (59.3)         | 11 (64.7)        | 1                                       |
| Not working, n (%)                             | 5 (26.3)         | 22 (34.9)        | 1.43 (-0.8, 1.51) <sup>4</sup> ; 0.544    | 11 (40.7)         | 6 (35.3)         | 0.79 (0.22, 2.76) <sup>2</sup> ; 0.717  |
| Preferred not to disclose work status, n (%)   | 1 (5.3)          | 1 (1.6)          | 0.33 (-3.97, 1.72) <sup>4</sup> ; 0.438   | 0 (0.0)           | 0 (0.0)          | NA                                      |
| Smoker, n (%)                                  | 3 (15.8)         | 11 (17.5)        | 1                                         | 4 (14.8)          | 2 (11.8)         | 1                                       |
| Non-smoker, n (%)                              | 15 (78.9)        | 45 (71.4)        | 0.82 (-1.61, 1.2) <sup>4</sup> ; 0.779    | 20 (74.1)         | 13 (76.5)        | 1.3 (0.21, 8.15) <sup>4</sup> ; 0.779   |
| Ex-smoker, n (%)                               | 1 (5.3)          | 7 (11.1)         | 1.91 (-1.81, 3.1) <sup>4</sup> ; 0.606    | 3 (11.1)          | 2 (11.8)         | 1.33 (0.11, 15.7) <sup>4</sup> ; 0.819  |
| <b>Hospital data</b>                           |                  |                  |                                           |                   |                  |                                         |
| Hospital stay, mean (SD), d                    | 11.42<br>(5.86)  | 19.65<br>(15.89) | 8.23 (0.91, 15.55) <sup>1</sup> ; 0.027   | 13.89<br>(10.80)  | 25.65<br>(21.18) | 11.76 (2.3, 21.22) <sup>1</sup> ; 0.015 |
| ISS Total, mean (SD)                           | 7.88<br>(8.07)   | 10.95<br>(7.64)  | 3.08 (-1.35, 7.51) <sup>1</sup> ; 0.173   | 8.78<br>(8.26)    | 10.00<br>(6.57)  | 1.22 (-3.95, 6.39) <sup>1</sup> ; 0.643 |
| ISS Mild, n (%)                                | 10 (62.5)        | 15 (34.1)        | 3.44 (1.09, 10.84) <sup>3</sup> ; 0.035   | 10 (55.6)         | 6 (40.0)         | 1.67 (0.46, 6.13) <sup>3</sup> ; 0.437  |
| ISS Moderate, n (%)                            | 5 (31.2)         | 18 (40.9)        |                                           | 5 (27.8)          | 6 (40.0)         |                                         |
| ISS Major, n (%)                               | 1 (6.2)          | 11 (25.0)        |                                           | 3 (16.7)          | 3 (20.0)         |                                         |
| Number of fractures, mean (SD)                 | 1.19<br>(0.54)   | 1.98<br>(1.31)   | 0.8 (0.14, 1.45) <sup>1</sup> ; 0.018     | 1.35<br>(0.89)    | 1.94<br>(1.20)   | 0.6 (-0.03, 1.22) <sup>1</sup> ; 0.062  |

| Characteristic                      | 6-months outcome |               |                                              | 12-months outcome |               |                                             |
|-------------------------------------|------------------|---------------|----------------------------------------------|-------------------|---------------|---------------------------------------------|
|                                     | Good             | Poor          | Difference (95%<br>CI); p-value              | Good              | Poor          | Difference (95%<br>CI); p-value             |
| Penetrating injury, n (%)           | 4 (21.1)         | 22 (34.9)     | 2.01 (0.64, 7.72) <sup>2</sup> ; 0.242       | 7 (25.9)          | 3 (17.6)      | 0.61 (0.12, 2.63) <sup>2</sup> ; 0.518      |
| Non-penetrating injury, n (%)       | 15 (78.9)        | 41 (65.1)     | 1                                            | 20 (74.1)         | 14 (82.4)     | 1                                           |
| <b>General health measures</b>      |                  |               |                                              |                   |               |                                             |
| EQ-5D-5L Index, mean (SD)           | 0.30 (0.25)      | -0.04 (0.31)  | -0.34 (-0.49, -0.18) <sup>1</sup> ; <0.001   | 0.14 (0.32)       | -0.06 (0.30)  | -0.19 (-0.39, 0.00) <sup>1</sup> ; 0.048    |
| EQ VAS, mean (SD)                   | 58.95 (21.19)    | 39.87 (22.38) | -19.07 (-30.42, -7.73) <sup>1</sup> ; 0.001  | 51.30 (22.47)     | 43.82 (26.84) | -7.47 (-22.18, 7.23) <sup>1</sup> ; 0.319   |
| SF-36v2 Mental, mean (SD)           | 43.36 (12.95)    | 33.93 (12.76) | -4.48 (-8.59, -0.37) <sup>1</sup> ; 0.032    | 36.03 (12.85)     | 33.82 (14.59) | -0.36 (-5.11, 4.38) <sup>1</sup> ; 0.880    |
| SF-36v2 Physical, mean (SD)         | 34.51 (9.55)     | 30.03 (7.44)  | -9.42 (-16.02, -2.83) <sup>1</sup> ; 0.005   | 31.70 (8.03)      | 31.33 (7.45)  | -2.21 (-10.42, 6) <sup>1</sup> ; 0.598      |
| <b>Psychological measures</b>       |                  |               |                                              |                   |               |                                             |
| HADS Anxiety, mean (SD)             | 5.56 (3.91)      | 8.77 (4.89)   | 3.21 (0.75, 5.68) <sup>1</sup> ; 0.011       | 7.70 (5.52)       | 8.29 (5.13)   | 0.59 (-2.67, 3.85) <sup>1</sup> ; 0.723     |
| HADS Depression, mean (SD)          | 5.42 (3.29)      | 8.22 (4.20)   | 2.8 (0.74, 4.86) <sup>1</sup> ; 0.008        | 7.26 (4.36)       | 8.12 (4.88)   | 0.86 (-1.91, 3.63) <sup>1</sup> ; 0.544     |
| TSK-11 Total, mean (SD)             | 23.06 (7.67)     | 28.23 (7.32)  | 5.17 (1.19, 9.16) <sup>1</sup> ; 0.011       | 25.96 (7.90)      | 27.60 (9.23)  | 1.64 (-3.79, 7.08) <sup>1</sup> ; 0.554     |
| PSEQ Total, mean (SD)               | 28.24 (13.38)    | 13.62 (13.72) | -14.61 (-21.95, -7.27) <sup>1</sup> ; <0.001 | 22.92 (16.49)     | 9.56 (13.58)  | -13.36 (-23.05, -3.67) <sup>1</sup> ; 0.007 |
| IES-R Total, mean (SD)              | 13.44 (11.09)    | 34.38 (21.16) | 20.93 (10.72, 31.15) <sup>1</sup> ; <0.001   | 22.44 (20.56)     | 35.12 (19.31) | 12.68 (0.31, 25.04) <sup>1</sup> ; 0.044    |
| IES-R Avoidance, mean (SD)          | 0.55 (0.51)      | 1.45 (0.94)   | 0.9 (0.45, 1.36) <sup>1</sup> ; <0.001       | 0.90 (0.90)       | 1.46 (0.92)   | 0.56 (0, 1.12) <sup>1</sup> ; 0.049         |
| IES-R Hyperarousal, mean (SD)       | 0.59 (0.69)      | 1.50 (1.08)   | 0.91 (0.39, 1.43) <sup>1</sup> ; 0.001       | 0.99 (1.03)       | 1.66 (1.10)   | 0.66 (0.01, 1.31) <sup>1</sup> ; 0.045      |
| IES-R Intrusion, mean (SD)          | 0.82 (0.68)      | 1.65 (1.09)   | 0.83 (0.32, 1.35) <sup>1</sup> ; 0.002       | 1.22 (1.04)       | 1.68 (0.96)   | 0.47 (-0.15, 1.08) <sup>1</sup> ; 0.137     |
| <b>Pain measures</b>                |                  |               |                                              |                   |               |                                             |
| Pain intensity (average), mean (SD) | 3.50 (2.42)      | 5.07 (1.70)   | 1.57 (0.47, 2.66) <sup>1</sup> ; 0.005       | 4.28 (1.81)       | 5.20 (2.46)   | 0.92 (-0.53, 2.38) <sup>1</sup> ; 0.215     |
| Pain intensity (current), mean (SD) | 2.88 (2.45)      | 3.77 (2.56)   | 0.9 (-0.55, 2.35) <sup>1</sup> ; 0.224       | 3.06 (2.13)       | 4.13 (2.77)   | 1.08 (-0.59, 2.75) <sup>1</sup> ; 0.207     |
| Pain intensity (worst), mean (SD)   | 6.56 (2.97)      | 8.95 (1.10)   | 2.39 (1.37, 3.41) <sup>1</sup> ; <0.001      | 7.67 (2.40)       | 8.60 (2.56)   | 0.93 (-0.76, 2.63) <sup>1</sup> ; 0.280     |
| Pain intensity (least), mean (SD)   | 1.94 (2.49)      | 2.27 (2.18)   | 0.34 (-0.96, 1.63) <sup>1</sup> ; 0.612      | 2.17 (2.31)       | 2.60 (2.59)   | 0.43 (-1.24, 2.1) <sup>1</sup> ; 0.611      |
| Pain extent, mean (SD), % pixels    | 2.73 (2.58)      | 9.56 (7.29)   | 6.82 (2.91, 10.74) <sup>1</sup> ; 0.001      | 4.77 (4.95)       | 6.80 (5.19)   | 2.03 (-1.48, 5.55) <sup>1</sup> ; 0.257     |

| Characteristic                                 | 6-months outcome |              |                                          | 12-months outcome |              |                                          |
|------------------------------------------------|------------------|--------------|------------------------------------------|-------------------|--------------|------------------------------------------|
|                                                | Good             | Poor         | Difference (95% CI); p-value             | Good              | Poor         | Difference (95% CI); p-value             |
| Pain region count, mean (SD), number           | 2.53 (2.27)      | 6.17 (4.80)  | 3.65 (1.41, 5.88) <sup>1</sup> ; 0.001   | 4.00 (3.76)       | 5.35 (5.28)  | 1.35 (-1.32, 4.02) <sup>1</sup> ; 0.321  |
| PainDETECT Total, mean (SD)                    | 8.38 (5.45)      | 14.24 (7.54) | 5.85 (1.35, 10.35) <sup>1</sup> ; 0.011  | 10.69 (6.80)      | 17.89 (5.04) | 7.2 (2.1, 12.3) <sup>1</sup> ; 0.006     |
| <b>Other measures</b>                          |                  |              |                                          |                   |              |                                          |
| Sleep quality last 24 hrs, mean (SD)           | 4.05 (2.32)      | 3.90 (2.58)  | -0.15 (-1.44, 1.15) <sup>1</sup> ; 0.823 | 4.26 (2.31)       | 3.82 (2.92)  | -0.44 (-1.99, 1.12) <sup>1</sup> ; 0.583 |
| Sleep quality since injury, mean (SD)          | 4.00 (1.97)      | 3.37 (2.57)  | -0.63 (-1.89, 0.62) <sup>1</sup> ; 0.321 | 3.81 (2.65)       | 3.53 (2.62)  | -0.29 (-1.89, 1.32) <sup>1</sup> ; 0.727 |
| Local heat pain threshold, mean (SD), °C       | 46.21 (3.47)     | 45.70 (3.58) | -0.5 (-2.59, 1.58) <sup>1</sup> ; 0.636  | 46.93 (2.84)      | 46.24 (3.11) | -0.68 (-2.75, 1.38) <sup>1</sup> ; 0.517 |
| Remote heat pain threshold, mean (SD), °C      | 46.03 (3.41)     | 45.96 (3.90) | -0.07 (-2.3, 2.16) <sup>1</sup> ; 0.952  | 47.20 (2.63)      | 46.16 (4.03) | -1.04 (-3.35, 1.28) <sup>1</sup> ; 0.38  |
| Local cold pain threshold, mean (SD), °C       | 4.68 (10.12)     | 5.84 (11.97) | 1.16 (-5.64, 7.95) <sup>1</sup> ; 0.739  | 4.21 (10.85)      | 9.01 (10.79) | 4.81 (-2.75, 12.37) <sup>1</sup> ; 0.212 |
| Remote cold pain threshold, mean (SD), °C      | 9.55 (10.93)     | 5.35 (11.53) | -4.2 (-10.91, 2.51) <sup>1</sup> ; 0.220 | 5.24 (10.53)      | 5.19 (10.15) | -0.05 (-7.29, 7.19) <sup>1</sup> ; 0.989 |
| Local pressure pain threshold, mean (SD), kPa  | 427 (208)        | 444 (225)    | 17 (-117, 151) <sup>1</sup> ; 0.803      | 376 (166)         | 404 (167)    | 28 (-87, 144) <sup>1</sup> ; 0.631       |
| Remote pressure pain threshold, mean (SD), kPa | 515 (259)        | 485 (250)    | -30 (-179, 118) <sup>1</sup> ; 0.690     | 475 (215)         | 482 (259)    | 7 (-155, 168) <sup>1</sup> ; 0.933       |
| C-reactive protein, mean (SD), mg/L            | 38 (62)          | 54 (62)      | 16 (-20, 52) <sup>1</sup> ; 0.382        | 63 (74)           | 53 (59)      | -10 (-56, 36) <sup>1</sup> ; 0.673       |

BMI = Body Mass Index; ISS = Injury Severity Scale; EQ-5D-5L = 5-level EuroQol 5-dimension; EQ VAS = EuroQol Visual Analogue Scale; SF-36v2 = 36-item Short Form Health Survey, version 2; HADS = Hospital Anxiety and Depression Scale; TSK-11 = Tampa Scale of Kinesiophobia; IES-R = Impact of Event Scale – Revised; PSEQ = Pain Self-Efficacy Questionnaire

<sup>1</sup>Output is the difference in means obtained from a linear regression model. Values <0 indicate lower average values in the Poor CPGS score group

<sup>2</sup>Output is the odds ratio obtained from a logistic regression model. Values of odds ratio<1 indicate lower event rates in the Poor CPGS score group

<sup>3</sup>Output is the odds ratio obtained from an ordinal logistic regression model. Values of odds ratio<1 indicate lower odds of moving to a 'higher' category in the Poor CPGS score group

<sup>4</sup>Output is the odds ratio obtained from a multinomial regression model. Values of odds ratio<1 indicate lower event rates in the Poor CPGS score group

**eTable 4. Multivariable Model Performance**

|                  |                     | <b>Observed at 6-months</b> |                     |              | <b>Observed at 12-months</b> |                     |              |
|------------------|---------------------|-----------------------------|---------------------|--------------|------------------------------|---------------------|--------------|
|                  |                     | <b>Good outcome</b>         | <b>Poor outcome</b> | <b>Total</b> | <b>Good outcome</b>          | <b>Poor outcome</b> | <b>Total</b> |
| <b>Predicted</b> | <b>Good outcome</b> | 7                           | 4                   | 11           | 18                           | 8                   | 26           |
|                  | <b>Poor outcome</b> | 6                           | 50                  | 56           | 4                            | 9                   | 13           |
|                  | <b>Total</b>        | 13                          | 54                  | 67           | 22                           | 17                  | 39           |

**eTable 5. Nomogram Scoring Tables**

| <b>Pain Intensity Average</b>  | <b>Points</b> |
|--------------------------------|---------------|
| 0                              | 0             |
| 1                              | 10            |
| 2                              | 20            |
| 3                              | 30            |
| 4                              | 40            |
| 5                              | 50            |
| 6                              | 60            |
| 7                              | 70            |
| 8                              | 80            |
| 9                              | 90            |
| 10                             | 100           |
|                                |               |
| <b>Pain Extent at Baseline</b> | <b>Points</b> |
| 0                              | 0             |
| 5                              | 14            |
| 10                             | 27            |
| 15                             | 41            |
| 20                             | 54            |
| 25                             | 68            |
| 30                             | 82            |
| 35                             | 95            |
|                                |               |
| <b>Number of Fractures</b>     | <b>Points</b> |
| 1                              | 0             |
| 1.5                            | 12            |
| 2                              | 24            |
| 2.5                            | 36            |
| 3                              | 48            |
| 3.5                            | 61            |
| 4                              | 73            |
| 4.5                            | 85            |
| 5                              | 97            |
|                                |               |
| <b>IES-R Total</b>             | <b>Points</b> |
| 0                              | 0             |
| 10                             | 9             |
| 20                             | 18            |
| 30                             | 27            |
| 40                             | 36            |
| 50                             | 45            |
| 60                             | 54            |
| 70                             | 63            |

|                     |                            |
|---------------------|----------------------------|
| 80                  | 73                         |
|                     |                            |
| <b>Total Points</b> | <b>Pr(Poor CPGS Score)</b> |
| 1                   | 0.05                       |
| 34                  | 0.20                       |
| 54                  | 0.40                       |
| 71                  | 0.60                       |
| 92                  | 0.80                       |
| 125                 | 0.95                       |

## References

1. Eriksen HR, Ihlebaek C, Ursin H. A scoring system for subjective health complaints (SHC). *Scand J Public Health*. 1999;27(1):63-72.
2. Baker SP, O'Neill B, Haddon W, Jr., Long WB. The injury severity score: a method for describing patients with multiple injuries and evaluating emergency care. *J Trauma*. 1974;14(3):187-196.
3. Ware J. SF-36 Health Survey Updated. *Spine*. 2000;25(24):3130-3139.
4. Brooks R. EuroQol: the current state of play. *Health policy (Amsterdam, Netherlands)*. 1996;37(1):53-72.
5. Cappelleri JC BA, McDermott AM, Sadosky AB, Petrie CD, Martin S. Psychometric properties of a single-item scale to assess sleep quality among individuals with fibromyalgia. *Health Qual Life Outcomes*. 2009;17(7):54.
6. Zigmond AS, Snaith RP. The hospital anxiety and depression scale. *Acta Psychiatr Scand*. 1983;67(6):361-370.
7. Woby SR, Roach NK, Urmston M, Watson PJ. Psychometric properties of the TSK-11: a shortened version of the Tampa Scale for Kinesiophobia. *Pain*. 2005;117(1-2):137-144.
8. Nicholas MK. The pain self-efficacy questionnaire: Taking pain into account. *Eur J Pain*. 2007;11(2):153-163.
9. Beck JG, Grant DM, Read JP, et al. The impact of event scale-revised: psychometric properties in a sample of motor vehicle accident survivors. *J Anxiety Disord*. 2008;22(2):187-198.
10. Von Korff M, Ormel J, Keefe FJ, Dworkin SF. Grading the severity of chronic pain. *Pain*. 1992;50(2):133-149.
11. Freynhagen R, Baron R, Gockel U, Tolle TR. painDETECT: a new screening questionnaire to identify neuropathic components in patients with back pain. *Curr Med Res Opin*. 2006;22(10):1911-1920.
12. Barbero M, Mores, F., Leoni, D., Gatti, R., Egloff, M., Falla, D. Test-retest reliability of pain extent and pain location using a novel method for pain drawing analysis. *European Journal of Pain* 2015;19:1129-1138.
13. Masters Steedman S, Middaugh SJ, Kee WG, Carson DS, Harden RN, Miller MC. Chronic-pain medications: equivalence levels and method of quantifying usage. *Clin J Pain*. 1992;8(3):204-214.
14. Harden RN, Weinland SR, Remble TA, et al. Medication Quantification Scale Version III: update in medication classes and revised detriment weights by survey of American Pain Society Physicians. *J Pain*. 2005;6(6):364-371.
15. Gallizzi M GC, Harden RN, Stanos S, Khan A. Medication Quantification Scale Version III: internal validation of detriment weights using a chronic pain population. *Pain Pract* 2008;8(1):1-4.
